# Supplementary material for: Outcome of Patients with Diffuse Large B-Cell Lymphoma Relapsing after Autologous Transplant before Availability of CAR-T Cell Treatment
Source: PubMed Central journal article supplement — Mediterr J Hematol Infect Dis. 2023 May 1;15(1):e2023025. doi: 10.4084/MJHID.2023.025 (PMC10171206; doi:10.4084/mjhid.2023.025), 2023-05-01

Supplementary files

Outcome of patients with diffuse large B-cell lymphoma relapsing after autologous transplant before availability of CAR-T cell treatment

Stefanie von Matt, Ulrike Bacher, Yara Banz,

Behrouz Mansouri Taleghani, Urban Novak, Thomas Pabst

Online Supplement

**Supplementary Figure S1.** PFS and OS analyzed according to various parameters like presence or absence of CD34+ stem cell selection (Figure A and B), transformed versus de novo lymphoma (Figure C and D), age at first diagnosis < versus ≥ 60 years (Figure E and F), presence or absence of b symptoms (Figure G and H) and bone marrow infiltration (Figure I and J) at first diagnosis, radiotherapy given during first- or second line therapy (Figure K and L) and remission state at ASCT (Figure M and N).

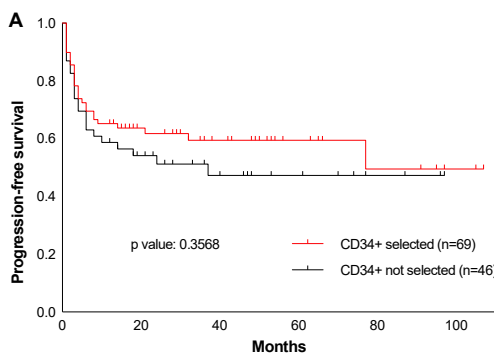

|                     |    |    |    |   |   |   |
|---------------------|----|----|----|---|---|---|
| subject at risk (n) | 46 | 22 | 12 | 7 | 3 | 0 |
|                     | 69 | 36 | 20 | 9 | 5 | 2 |

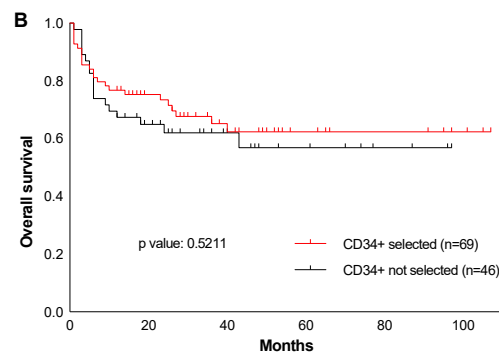

|                     |    |    |    |   |   |   |
|---------------------|----|----|----|---|---|---|
| subject at risk (n) | 46 | 26 | 13 | 7 | 3 | 0 |
|                     | 69 | 43 | 23 | 9 | 6 | 3 |

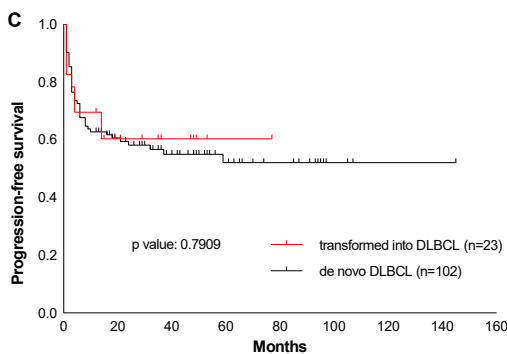

|                     |     |    |    |    |    |   |   |   |   |
|---------------------|-----|----|----|----|----|---|---|---|---|
| subject at risk (n) | 102 | 52 | 31 | 18 | 12 | 3 | 1 | 1 | 0 |
|                     | 23  | 11 | 7  | 2  | 0  | 0 | 0 | 0 | 0 |

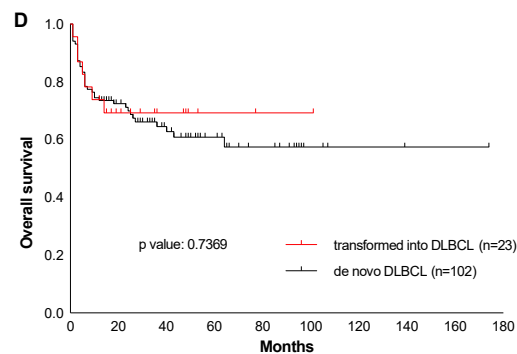

|                     |     |    |    |    |    |   |   |   |   |   |
|---------------------|-----|----|----|----|----|---|---|---|---|---|
| subject at risk (n) | 102 | 63 | 36 | 20 | 13 | 4 | 2 | 1 | 1 | 0 |
|                     | 23  | 12 | 7  | 2  | 1  | 1 | 0 | 0 | 0 | 0 |

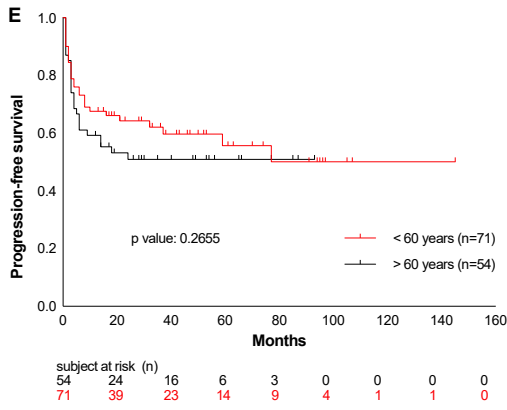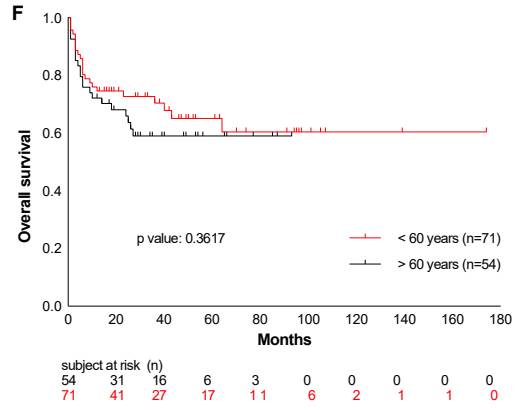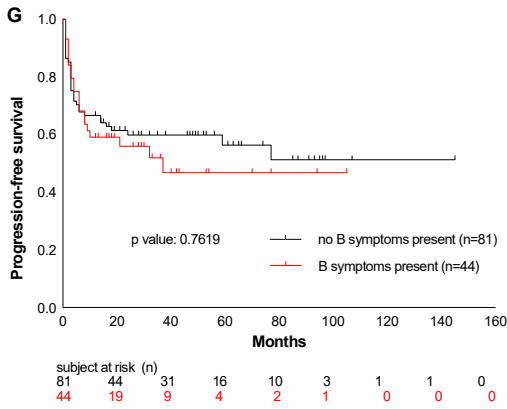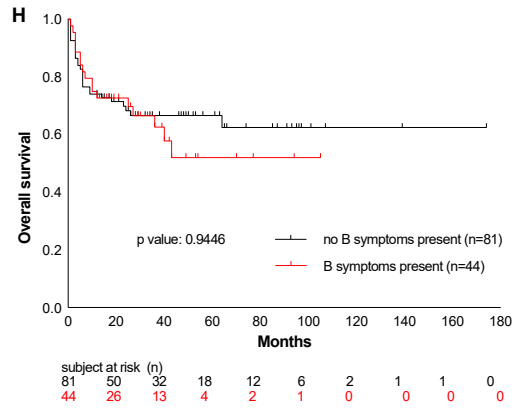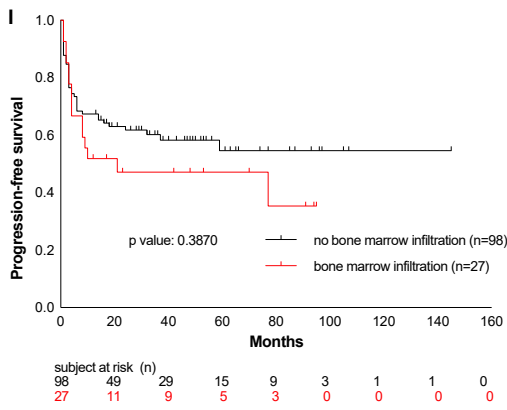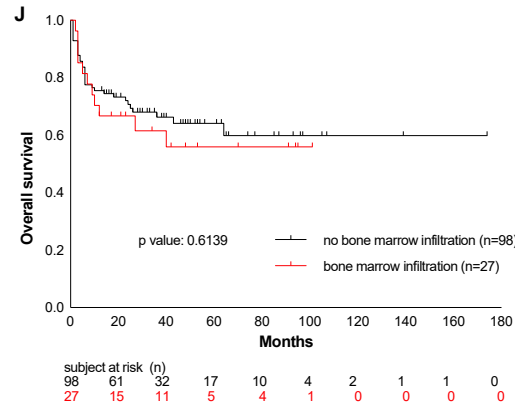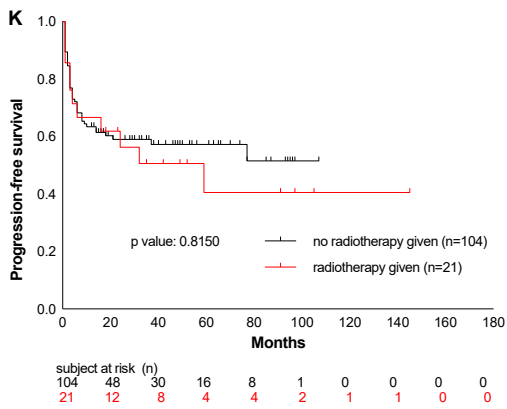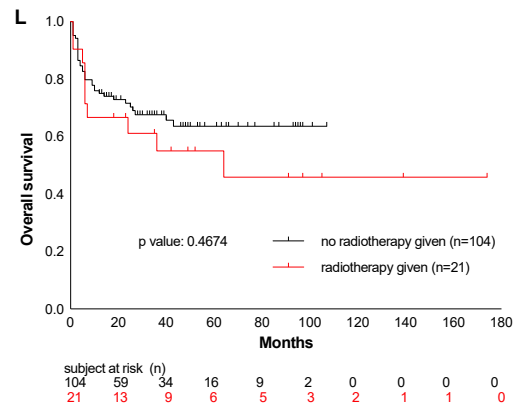

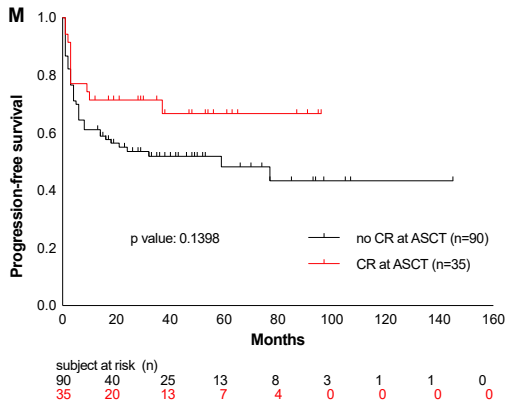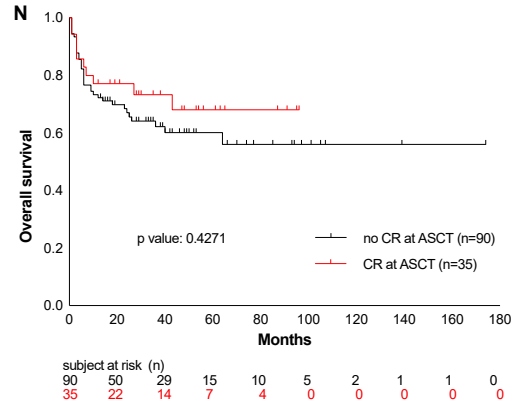

Supplement: MJHID-15-1-e2023025Supplementaryfiles.pdf [file MJHID-15-1-e2023025Supplementaryfiles.pdf]
